# Supplementary material
Source: PubMed Central journal article supplement (PMC9081131)
Supplement: NIHMS1768555-supplement-1.pdf [file NIHMS1768555-supplement-1.pdf]

## SUPPLEMENTAL TABLES/FIGURES

**Supplemental Table 1.** Number of patients registered and number of patient visits by calendar month and area council.

| Area         | Abaji        |             | Abuja Municipal Area Council |             | Bwari        |             | Gwagwalada   |             | Kuje         |             | Kwali        |             | Total        |              |
|--------------|--------------|-------------|------------------------------|-------------|--------------|-------------|--------------|-------------|--------------|-------------|--------------|-------------|--------------|--------------|
|              | Registration | Visit       | Registration                 | Visit       | Registration | Visit       | Registration | Visit       | Registration | Visit       | Registration | Visit       | Registration | Visit        |
| January      | 17           | 22          | 1                            | 4           | 0            | 2           | 42           | 44          | 0            | 0           | 4            | 8           | 64           | 80           |
| February     | 165          | 168         | 88                           | 95          | 78           | 78          | 140          | 164         | 42           | 46          | 51           | 52          | 564          | 602          |
| March        | 144          | 197         | 166                          | 195         | 76           | 103         | 112          | 167         | 73           | 88          | 36           | 63          | 607          | 813          |
| April        | 50           | 129         | 102                          | 189         | 68           | 104         | 60           | 186         | 23           | 70          | 57           | 108         | 360          | 786          |
| May          | 42           | 180         | 131                          | 244         | 62           | 135         | 72           | 271         | 46           | 111         | 54           | 130         | 407          | 1071         |
| June         | 120          | 368         | 183                          | 358         | 102          | 190         | 166          | 428         | 39           | 154         | 55           | 146         | 665          | 1644         |
| July         | 63           | 353         | 146                          | 353         | 101          | 214         | 113          | 423         | 24           | 150         | 80           | 191         | 527          | 1684         |
| August       | 45           | 302         | 136                          | 345         | 65           | 176         | 109          | 497         | 24           | 170         | 56           | 192         | 435          | 1682         |
| September    | 45           | 303         | 132                          | 356         | 81           | 174         | 72           | 434         | 19           | 176         | 42           | 190         | 391          | 1633         |
| October      | 51           | 358         | 114                          | 301         | 80           | 225         | 69           | 408         | 20           | 174         | 28           | 158         | 362          | 1624         |
| November     | 91           | 340         | 200                          | 356         | 60           | 147         | 77           | 400         | 21           | 171         | 96           | 222         | 545          | 1636         |
| <b>Total</b> | <b>833</b>   | <b>2720</b> | <b>1399</b>                  | <b>2796</b> | <b>773</b>   | <b>1548</b> | <b>1032</b>  | <b>3422</b> | <b>331</b>   | <b>1310</b> | <b>559</b>   | <b>1460</b> | <b>4927</b>  | <b>13256</b> |

\*Some patients' registration dates were not the same as the first visit dates. When there was a discrepancy, the first visit date was used to determine the starting period for study participation.

**Supplemental Table 2.** Hypertension treatment and control rate at the end of the first visit (i.e. rate when patients complete their visit) by calendar month and sex.

| Month        | Registered patients |        | Treatment Rate* (95% CI) |                   |                 | Control Rate (95% CI) |                   |                 |
|--------------|---------------------|--------|--------------------------|-------------------|-----------------|-----------------------|-------------------|-----------------|
|              | Male                | Female | Male                     | Female            | <i>P</i> -value | Male                  | Female            | <i>P</i> -value |
| January      | 16                  | 48     | 0.94 (0.80, 1.004)       | 0.75 (0.62, 0.88) | 0.11            | 0.44 (0.16, 0.71)     | 0.23 (0.11, 0.35) | 0.11            |
| February     | 188                 | 376    | 0.82 (0.77, 0.88)        | 0.85 (0.81, 0.88) | 0.52            | 0.14 (0.09, 0.19)     | 0.23 (0.18, 0.27) | 0.01            |
| March        | 193                 | 414    | 0.84 (0.79, 0.90)        | 0.91 (0.88, 0.94) | 0.02            | 0.16 (0.11, 0.21)     | 0.21 (0.17, 0.25) | 0.15            |
| April        | 146                 | 214    | 0.92 (0.87, 0.96)        | 0.92 (0.88, 0.95) | 0.95            | 0.12 (0.07, 0.18)     | 0.12 (0.08, 0.17) | 0.96            |
| May          | 159                 | 248    | 0.93 (0.89, 0.97)        | 0.88 (0.84, 0.92) | 0.09            | 0.11 (0.06, 0.16)     | 0.14 (0.10, 0.18) | 0.31            |
| June         | 201                 | 464    | 0.88 (0.83, 0.92)        | 0.84 (0.81, 0.87) | 0.24            | 0.10 (0.06, 0.15)     | 0.11 (0.08, 0.14) | 0.77            |
| July         | 192                 | 335    | 0.88 (0.83, 0.93)        | 0.87 (0.83, 0.91) | 0.70            | 0.07 (0.03, 0.10)     | 0.10 (0.07, 0.14) | 0.16            |
| August       | 143                 | 292    | 0.94 (0.91, 0.98)        | 0.87 (0.83, 0.91) | 0.02            | 0.14 (0.08, 0.20)     | 0.12 (0.09, 0.16) | 0.63            |
| September    | 106                 | 285    | 0.92 (0.87, 0.98)        | 0.94 (0.91, 0.97) | 0.66            | 0.11 (0.05, 0.17)     | 0.11 (0.08, 0.15) | 0.98            |
| October      | 101                 | 261    | 0.97 (0.94, 1.004)       | 0.95 (0.93, 0.98) | 0.49            | 0.06 (0.01, 0.11)     | 0.10 (0.06, 0.13) | 0.27            |
| November     | 197                 | 348    | 0.94 (0.91, 0.98)        | 0.93 (0.90, 0.95) | 0.40            | 0.08 (0.04, 0.11)     | 0.09 (0.06, 0.13) | 0.46            |
| <b>Total</b> | 1642                | 3285   | 0.90 (0.88, 0.91)        | 0.89 (0.88, 0.90) | 0.23            | 0.11 (0.10, 0.13)     | 0.14 (0.13, 0.15) | 0.01            |

\* Treatment rate at the end of the baseline visit can also be considered the rate when patients complete their visit.

**Supplemental Table 3.** Baseline hypertension treatment and control rates (95% CI) at the end of the baseline visit, overall and by sex and area council.

| Area                                | Treatment Rate* (95% CI) |                   |         | Control Rate (95% CI) |                   |         |
|-------------------------------------|--------------------------|-------------------|---------|-----------------------|-------------------|---------|
|                                     | Male                     | Female            | P-value | Male                  | Female            | P-value |
| <b>Abaji</b>                        | 0.90 (0.87, 0.93)        | 0.92 (0.90, 0.95) | 0.27    | 0.22 (0.18, 0.27)     | 0.30 (0.26, 0.34) | 0.03    |
| <b>Abuja Municipal Area Council</b> | 0.88 (0.85, 0.91)        | 0.89 (0.86, 0.90) | 0.87    | 0.11 (0.08, 0.14)     | 0.12 (0.10, 0.14) | 0.07    |
| <b>Bwari</b>                        | 0.88 (0.84, 0.92)        | 0.89 (0.86, 0.92) | 0.62    | 0.04 (0.01, 0.06)     | 0.08 (0.06, 0.10) | 0.02    |
| <b>Gwagwalada</b>                   | 0.90 (0.87, 0.93)        | 0.84 (0.81, 0.87) | 0.01    | 0.13 (0.09, 0.16)     | 0.13 (0.11, 0.16) | 0.84    |
| <b>Kuje</b>                         | 0.90 (0.85, 0.95)        | 0.87 (0.83, 0.92) | 0.48    | 0.14 (0.08, 0.20)     | 0.16 (0.11, 0.22) | 0.60    |
| <b>Kwali</b>                        | 0.95 (0.92, 0.97)        | 0.95 (0.93, 0.97) | 0.82    | 0.04 (0.02, 0.08)     | 0.03 (0.01, 0.05) | 0.51    |
| <b>Total</b>                        | 0.90 (0.88, 0.91)        | 0.89 (0.88, 0.90) | 0.23    | 0.11 (0.10, 0.13)     | 0.14 (0.13, 0.15) | 0.01    |

\* Treatment rate at the end of the baseline visit can also be considered the rate when patients complete their visit.

**Supplemental Table 4.** Mixed-effect, multivariable logistic regression models to evaluate predictors of hypertension treatment and control status at the start of the baseline visit.

| Variables                      | Baseline Treatment       |                         |                                     | Baseline Control         |                         |                                     |
|--------------------------------|--------------------------|-------------------------|-------------------------------------|--------------------------|-------------------------|-------------------------------------|
|                                | Model 1                  | Model 2                 | Model 3                             | Model 1                  | Model 2                 | Model 3                             |
|                                | Unadjusted OR<br>(95%CI) | Adjusted* OR<br>(95%CI) | Adjusted <sup>†</sup> OR<br>(95%CI) | Unadjusted OR<br>(95%CI) | Adjusted* OR<br>(95%CI) | Adjusted <sup>†</sup> OR<br>(95%CI) |
| Age, by year                   | 1.015 (1.01, 1.02)       | 1.016 (1.01, 1.02)      | 1.02 (1.01, 1.03)                   | 1.023 (1.02, 1.03)       | 1.025 (1.02, 1.03)      | 1.014 (1.01, 1.02)                  |
| Sex                            |                          |                         |                                     |                          |                         |                                     |
| Male                           | Reference                | Reference               | Reference                           | Reference                | Reference               | Reference                           |
| Female                         | 0.996 (0.88, 1.12)       | 1.08 (0.95, 1.22)       | 1.12 (0.95, 1.32)                   | 1.26 (1.05, 1.52)        | 1.43 (1.18, 1.72)       | 1.30 (1.05, 1.62)                   |
| BMI, by kg/m <sup>2</sup>      | 1.02 (1.01, 1.03)        | 1.02 (1.01, 1.03)       | 1.02 (1.003, 1.03)                  | 1.01 (0.99, 1.02)        | 1.01 (0.997, 1.03)      | 1.003 (0.99, 1.02)                  |
| Alcohol use                    |                          |                         |                                     |                          |                         |                                     |
| Non-current user               | Reference                | Reference               | Reference                           | Reference                | Reference               | Reference                           |
| Current user                   | 0.65 (0.50, 0.86)        | 0.64 (0.48, 0.85)       | 0.71 (0.50, 1.02)                   | 0.71 (0.45, 1.12)        | 0.78 (0.49, 1.23)       | 0.76 (0.46, 1.27)                   |
| Use of fixed-dose combination‡ |                          |                         |                                     |                          |                         |                                     |
| No                             |                          | Non-Estimable           |                                     | Reference                | Reference               | Reference                           |
| Yes                            |                          | Non-Estimable           |                                     | 2.38 (2.004, 2.82)       | 2.22 (1.87, 2.64)       | 1.83 (1.49, 2.26)                   |
| Education§                     |                          |                         |                                     |                          |                         |                                     |
| Never attended school          | Reference                | Reference               | Reference                           | Reference                | Reference               | Reference                           |
| Primary School                 | 1.20 (1.01, 1.41)        | 1.36 (1.15, 1.62)       | 1.45 (1.15, 1.80)                   | 0.90 (0.71, 1.14)        | 1.08 (0.84, 1.38)       | 1.15 (0.87, 1.53)                   |
| Secondary School               | 1.13 (0.97, 1.32)        | 1.46 (1.23, 1.72)       | 1.39 (1.11, 1.75)                   | 0.55 (0.43, 0.71)        | 0.77 (0.59, 1.01)       | 0.94 (0.69, 1.29)                   |
| High school                    | 1.19 (0.87, 1.61)        | 1.43 (1.05, 1.96)       | 1.62 (1.10, 2.39)                   | 1.001 (0.65, 1.53)       | 1.32 (0.85, 2.04)       | 1.69 (1.05, 2.73)                   |
| College/University             | 1.35 (1.14, 1.59)        | 1.69 (1.42, 2.02)       | 1.93 (1.53, 2.46)                   | 0.94 (0.75, 1.19)        | 1.31 (1.02, 1.68)       | 1.37 (1.01, 1.85)                   |
| Professional Degree            | 1.88 (1.31, 2.72)        | 2.23 (1.54, 3.25)       | 2.29 (1.44, 3.68)                   | 1.86 (1.23, 2.80)        | 2.43 (1.60, 3.70)       | 1.87 (1.14, 3.06)                   |
| Other                          | 4.38 (2.13, 9.02)        | 5.16 (2.50, 10.67)      | 3.29 (1.41, 7.69)                   | 2.16 (1.17, 3.97)        | 2.80 (1.50, 5.21)       | 2.04 (1.03, 4.05)                   |

| Variables                    | Baseline Treatment |                   |                   | Baseline Control  |                   |                   |
|------------------------------|--------------------|-------------------|-------------------|-------------------|-------------------|-------------------|
|                              | Model 1            | Model 2           | Model 3           | Model 1           | Model 2           | Model 3           |
| Area                         |                    |                   |                   |                   |                   |                   |
| Abaji                        | Reference          | Reference         | Reference         | Reference         | Reference         | Reference         |
| Abuja Municipal Area Council | 0.76 (0.63, 0.92)  | 0.87 (0.72, 1.05) | 0.98 (0.22, 4.27) | 0.34 (0.27, 0.43) | 0.39 (0.31, 0.49) | 0.41 (0.18, 0.92) |
| Bwari                        | 0.35 (0.28, 0.43)  | 0.38 (0.31, 0.47) | 0.35 (0.07, 1.90) | 0.19 (0.14, 0.26) | 0.21 (0.15, 0.29) | 0.24 (0.09, 0.64) |
| Gwagwalada                   | 0.43 (0.35, 0.52)  | 0.46 (0.38, 0.55) | 0.38 (0.08, 1.80) | 0.40 (0.31, 0.50) | 0.42 (0.33, 0.54) | 0.45 (0.19, 1.09) |
| Kuje                         | 0.42 (0.32, 0.55)  | 0.45 (0.34, 0.58) | 0.28 (0.05, 1.49) | 0.48 (0.35, 0.68) | 0.53 (0.38, 0.74) | 0.47 (0.17, 1.27) |
| Kwali                        | 0.49 (0.39, 0.61)  | 0.53 (0.42, 0.67) | 0.33 (0.06, 1.74) | 0.10 (0.06, 0.16) | 0.11 (0.07, 0.18) | 0.13 (0.05, 0.38) |

\*Adjusted for age and sex. †Adjusted for age, sex, BMI, alcohol use, fixed-dose combination, education, and primary health care center (random effect). ‡ Fixed-dose combination at the start of the baseline visit, also known as “walk-in” period. § $P_{trend} < 0.001$  across levels of education for walk-in hypertension treatment rate;  $P_{trend} = 0.14$  across levels of education for hypertension control rate. ¶“Other” includes Arabic school, Islamic school, Bible school, etc.

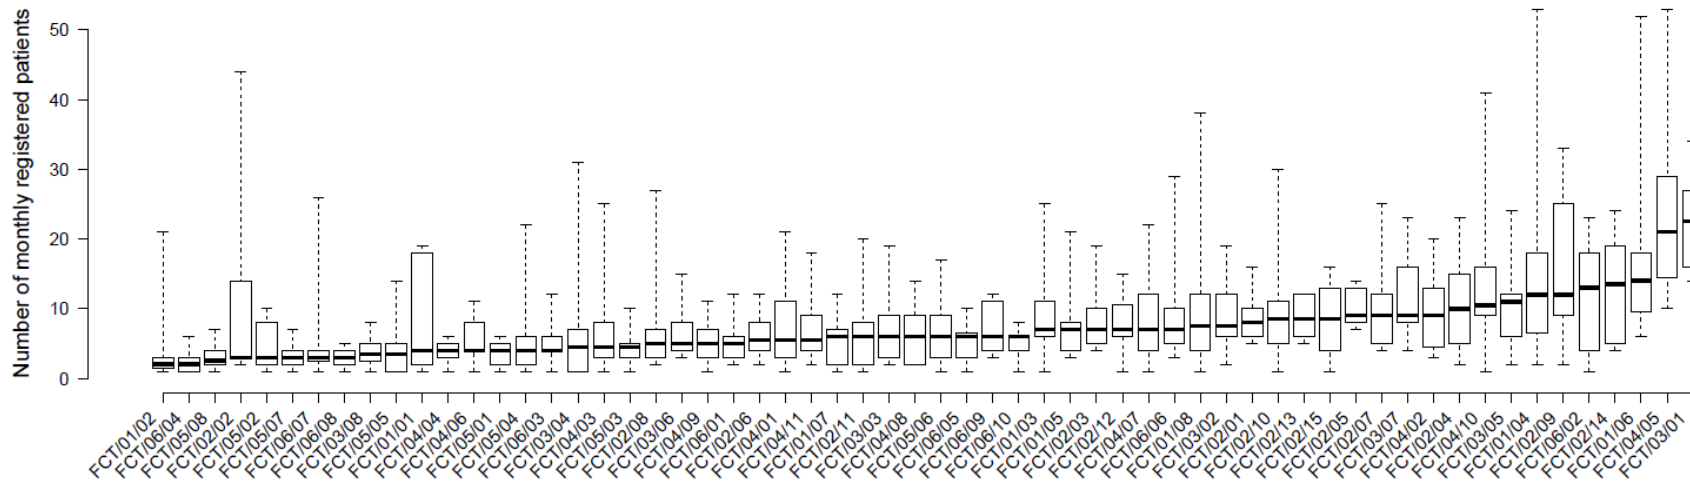

**Supplemental Figure 1.** Monthly registered patients by primary health care center. Median number of monthly registered patients for baseline was 7 (IQR: 4 – 9).

**Supplemental Figure 2a.** Mean 31-day retention rate between baseline and follow-up visit by primary health care center was 25% (95% CI: 20% – 31%).

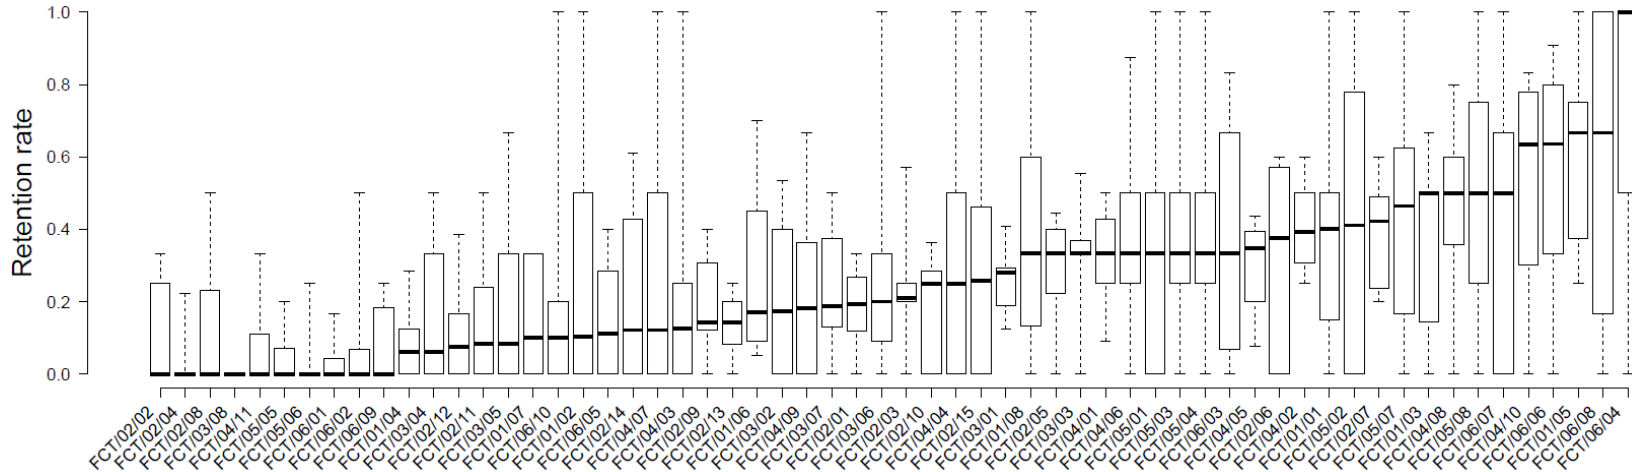

**Supplemental Figure 2b.** Mean 37-day retention rate between baseline and follow-up visit by primary health care center was 39% (95% CI: 32% – 45%).

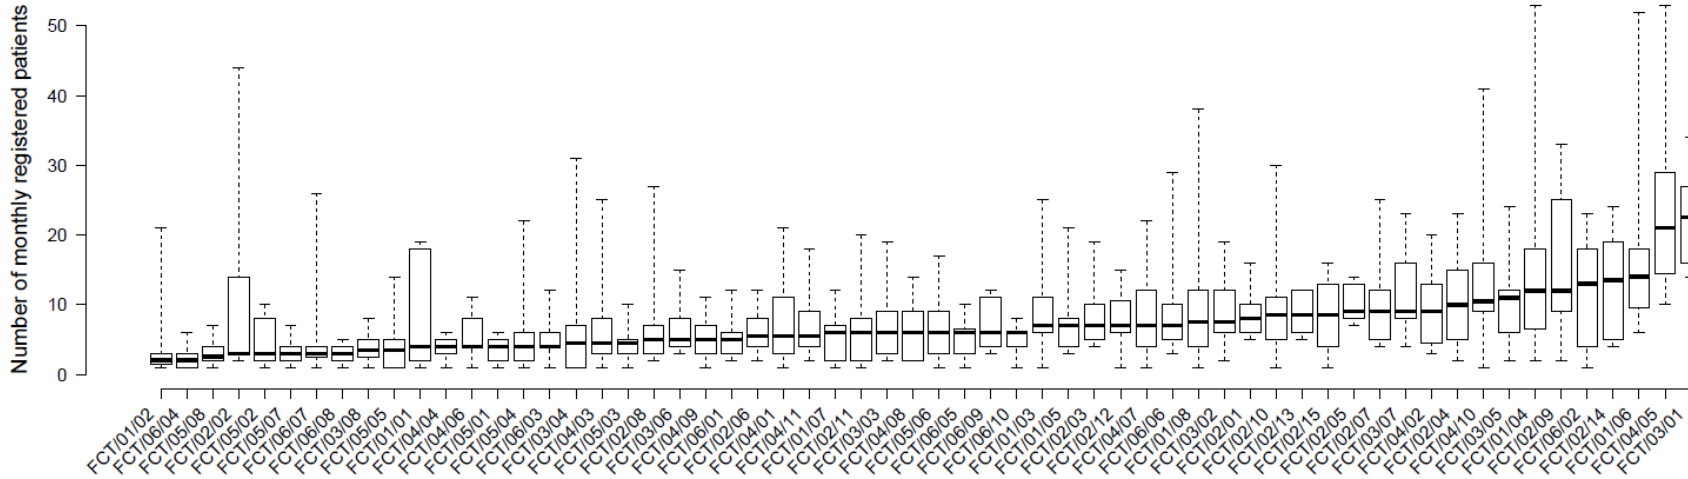

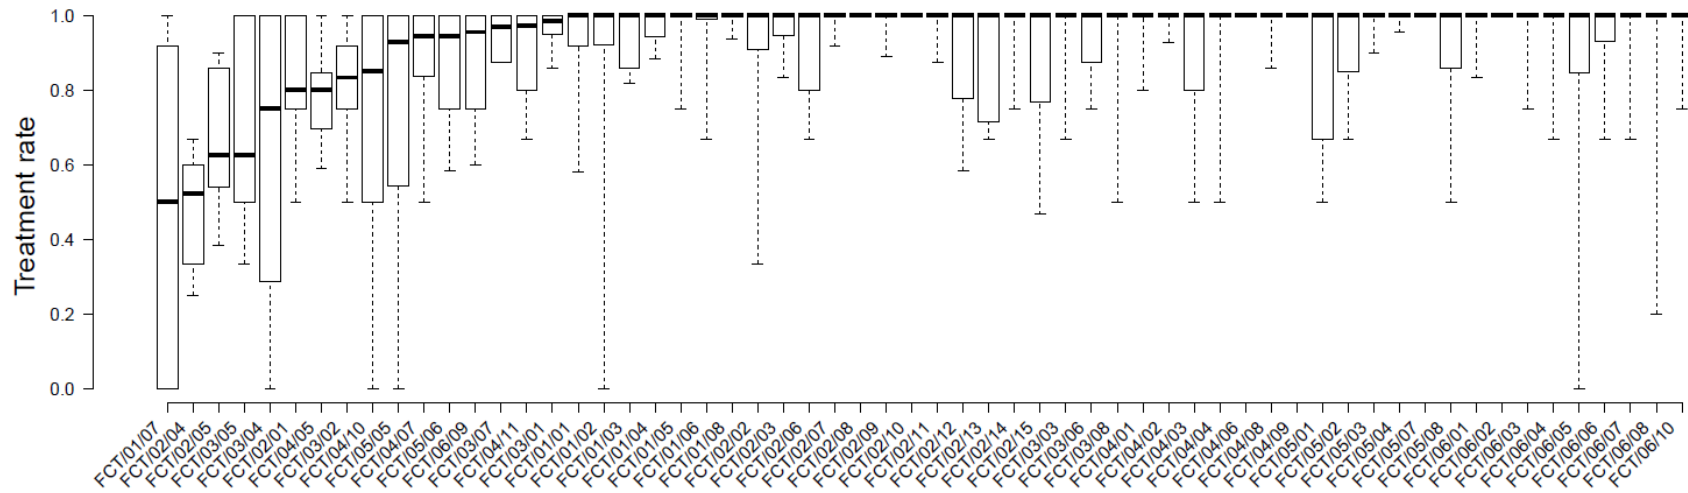

**Supplemental Figure 3.** Baseline hypertension treatment rate (monthly) by primary health care center. Mean treatment rate at baseline was 0.89 (95% CI: 0.88 – 0.90).



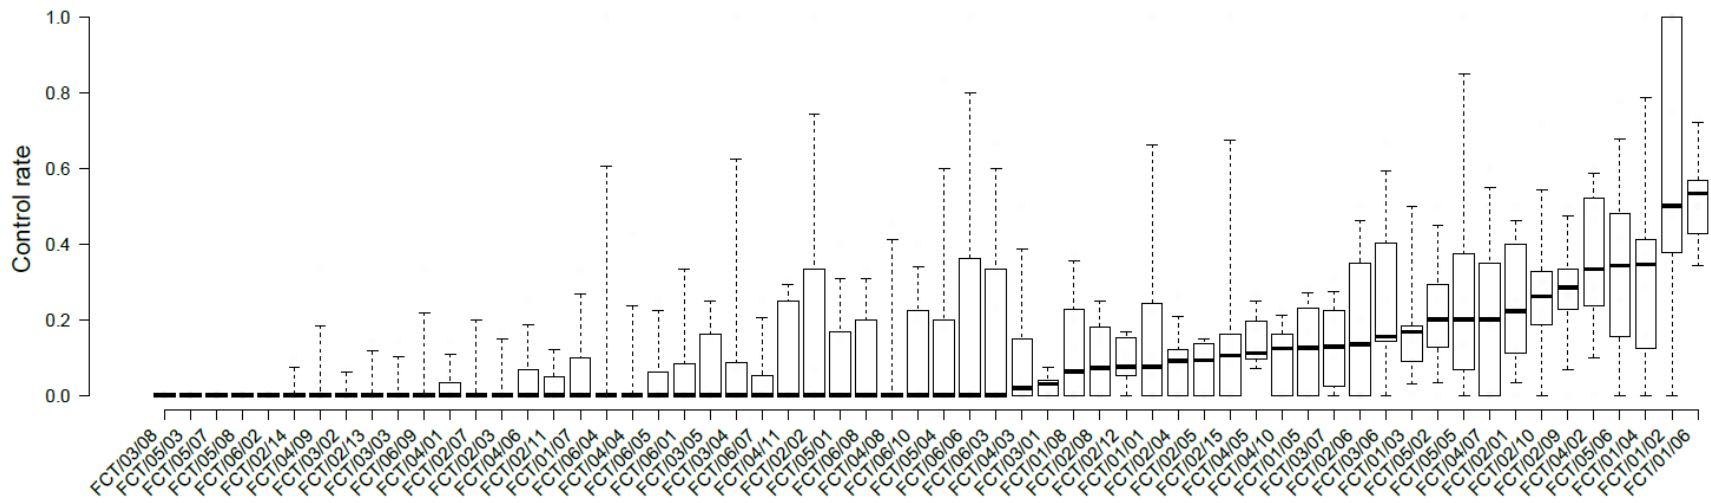

**Supplemental Figure 4.** Baseline hypertension control rate (monthly) by primary health care center. Mean control rate at baseline was 0.13 (95% CI: 0.12 – 0.14).
